# Supplementary material for: Particle filter based volcanic ash emission inversion applied to a hypothetical sub-Plinian Eyjafjallajökull eruption using the chemical component of the Ensemble for Stochastic Integration of Atmospheric Simulations (ESIAS-chem) version 1.0
Source: Copernicus journal article supplement (doi:10.5194/gmd-2021-30), 2021-05-10
Supplement: Supplementary file [file AppendixA_Supplement_to_RC1.pdf › AppendixA_Supplement_to_RC1.pdf]

# Appendix A: Comparison of emission profiles for all assimilation windows

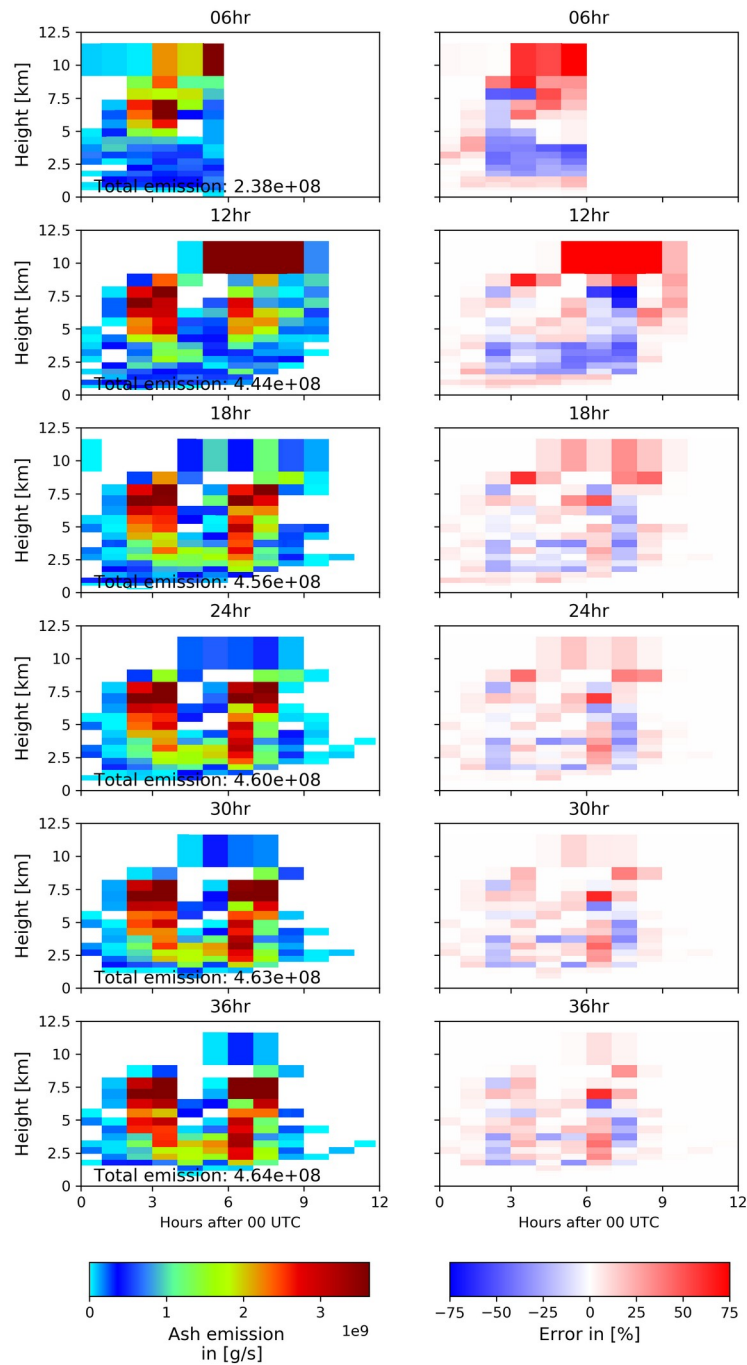

Figure A1. Emission profile of the ensemble mean (left panels) and its relative error to the nature run emission profile (right panels) for different assimilation window lengths on 15 April 2010.

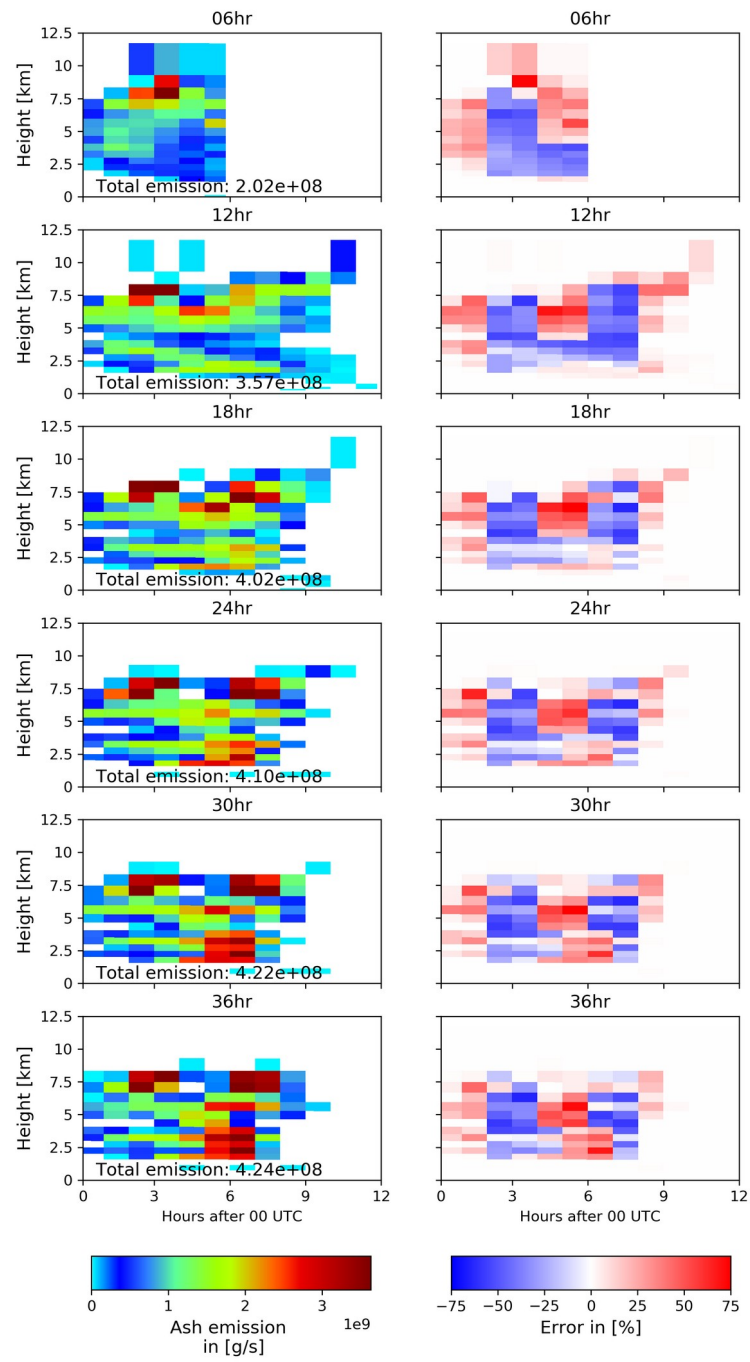

Figure A2. Emission profile of the ensemble mean (left panels) and its relative error to the nature run emission profile (right panels) for different assimilation window lengths on 29 April 2010.
